# Supplementary material for: Evaluation of CMIP6 model performances in simulating fire weather spatiotemporal variability on global and regional scales
Source: Copernicus journal article supplement (doi:10.5194/gmd-16-3103-2023), 2023-06-01
Supplement: Supplementary file 1 [file gmd-16-3103-2023-supplement.pdf]

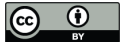

*Supplement of*

## **Evaluation of CMIP6 model performances in simulating fire weather spatiotemporal variability on global and regional scales**

**Carolina Gallo et al.**

*Correspondence to:* Carolina Gallo ([gallogrc@uni.coventry.ac.uk](mailto:gallogrc@uni.coventry.ac.uk))

The copyright of individual parts of the supplement might differ from the article licence.

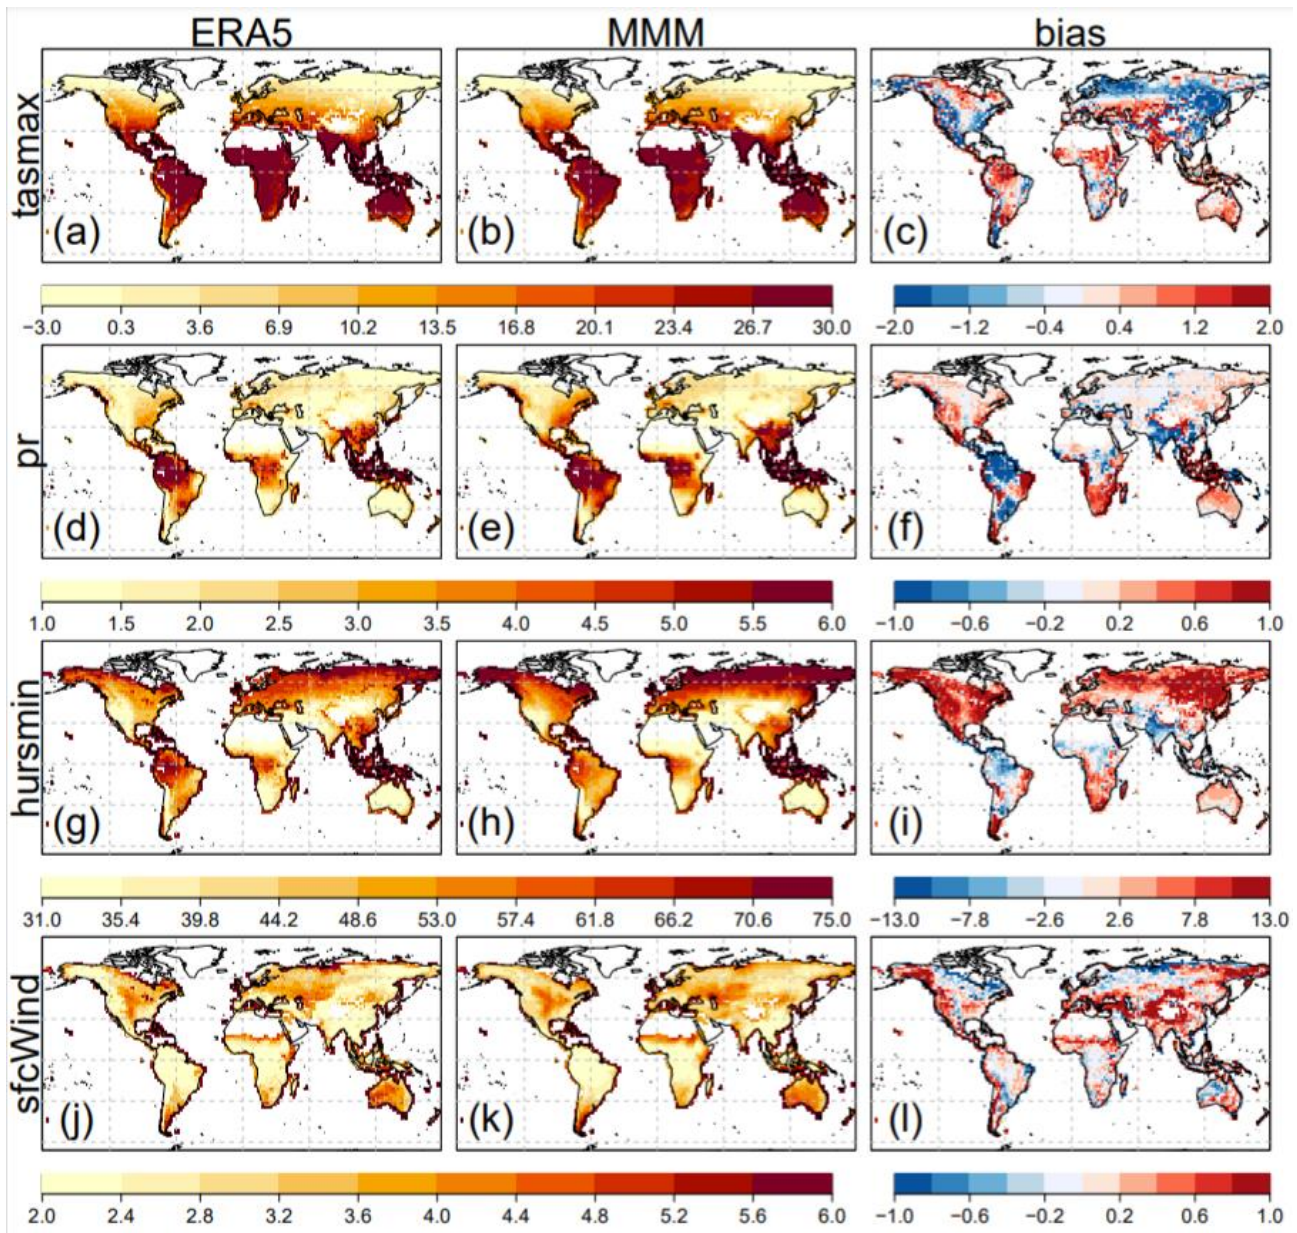

Figure S1: Annually-averaged monthly means for ERA5 (left column) and the CMIP6 multi-model mean (centre column), and bias in the CMIP6 multi-model mean with respect to ERA5 (right column) for maximum temperature (a-c), precipitation (d-f), minimum humidity (g-i), and wind speed (j-l). Lighter yellow colour represents lower danger and darker brown represents higher danger. Meanwhile, white colour represents lower bias and darker blue/red higher negative/positive bias.

15
